# Supplementary material for: Validity and reliability of the Sinhalese version of the perceived stress scale questionnaire among Sri Lankans
Source: PubMed Central journal article supplement (PMC10313401; doi:10.3389/fpsyg.2023.1152002), 2023-06-16
Supplement: Data_Sheet_1.pdf [file Data_Sheet_1.pdf]

**යහපැවැත්ම සඳහා මග: අතිරේක කළ සංගීත විකිත්සාවෙන් ඇති විය හැකි මානසික සහනය නිසා සිදුවිය හැකි පෞච්ඡ අණුක වෙනස් වීම් ගවේෂණය කිරීම**

**පර්යේෂණය: AHEAD/DOR/STEM/+HEMS No 78**

**ප්‍රත්‍යක්ෂ ආතති මැනුම් ප්‍රශ්නාවලිය**

පහත ප්‍රශ්නාවලිය පසුගිය මාසය තුළ ඔබට ඇති වූ සිතිවිලි හා හැඟීම් පිළිබඳ ව විමසනු ඇත. පහත සෑම ප්‍රශ්නයක් සඳහා ම පිළිතුරු වශයෙන් ඔබට කෙතරම් වාර ගණනක් දැනුණා ද?/ හැඟුණේ ද? යන්න ඊට අදාළ අංකය වටා කවයක් ඇඳීමෙන් ලකුණු කරන්න.

නම: ..... දිනය: .....

වයස: ..... ස්ත්‍රී/ පුරුෂ භාවය: ගැහැණු/ පිරිමි/ වෙනත්

| 0               | 1                  | 2        | 3          | 4         |
|-----------------|--------------------|----------|------------|-----------|
| කිසිවිටෙක නොමැත | ආසන්න වශයෙන් නොමැත | සමහර විට | කිහිප වරක් | බොහෝ වරක් |

1. ගිය මාසයේ නිතරම වාගේ ඔබට සිද්ධ වූණු ඔබ බලාපොරොත්තු නොවූ දේවල් නිසා කණගාටුවෙන් සිටියා ද? 0 1 2 3 4
2. ගිය මාසයේ නිතරම වාගේ ඔබගේ ජීවිතයේ ඉතාමත් වැදගත් දේවල් ඔබට පාලනය කරගන්න බැරි වූණා කියා දැනුණා ද? 0 1 2 3 4
3. ගිය මාසයේ නිතරම වගේ ඔබ මානසික ආතතියෙන් සිටියා ද? 0 1 2 3 4
4. ගිය මාසයේ නිතරම වගේ ඔබ ඔබගේ ප්‍රශ්න විසඳාගන්න පුළුවන් වූණා කියන ආත්ම විශ්වාසයෙන් සිටියා ද? 0 1 2 3 4
5. ගිය මාසයේ නිතරම වගේ ඔබට කැමති විදියට වැඩ සිද්ධ වූණා ද? 0 1 2 3 4
6. ගිය මාසයේ නිතරම වගේ ඔබගේ නිබ්බ වැඩ ප්‍රමාණය දරන්න බැරි තරම් කියා දැනුණා ද? 0 1 2 3 4
7. ගිය මාසයේ නිතරම වගේ ඔබගේ අපහසු කරදරකාරී හැඟීම් පාලනය කරගත්තේ ද? 0 1 2 3 4
8. ගිය මාසයේ නිතරම වගේ ඔබගේ දේවල් හොඳට සිදු කලා කියලා ඔබට දැනුණා ද? 0 1 2 3 4
9. ගිය මාසයේ නිතරම වගේ ඔබට පාලනය කරගන්න බැරි වූණු දේවල් ගැන ඔබට කේන්ති ගියා ද? 0 1 2 3 4
10. ගිය මාසයේ නිතරම වගේ ඔබට විසඳාගන්න බැරි තරම් ප්‍රශ්න/ ගැටළු ගොඩ ගැසුණා බවක් ඔබට දැනුණා ද? 0 1 2 3 4

මෙම ව්‍යාපෘතිය කොළඹ විශ්ව විද්‍යාලයේ වෛද්‍ය පීඨයේ ආචාරධර්ම සමාලෝචන කමිටුව විසින් අනුමත කර ඇත. 0112695300 (extension 240) (උදේ 9 සිට සවස 4 දක්වා) අමතන්න. විද්‍යුත් තැපෑලක් එවීමෙන් ද ඔබට පැහැදිලි කිරීම් ලබා ගැනීමට/ යම් ගැටළු වාර්තා කිරීමට හෝ අධ්‍යයනය පිළිබඳ පැමිණිලි කිරීමට හැක. අවශ්‍ය නම් කමිටුව අමතන්න.
